# Supplementary material
Source: PubMed Central journal article supplement (PMC5459356)
Supplement: NIHMS859292-supplement-Supplemental_Data.pdf [file NIHMS859292-supplement-Supplemental_Data.pdf]

1 **SUPPLEMENTAL METHODS**

2 **Cell lines, xenografts and patient samples**

3 REH, RS4;11 and Nalm-6 cells were obtained from the American Type Culture  
4 Collection (ATCC; Manassas, VA). Nalm-20, Nalm-21, Tom-1, RCH-ACV, Kasumi-2,  
5 697, KOPN-8 cells were obtained from the Leibniz Institute DSMZ-German Collection of  
6 Microorganisms and Cell Cultures (DSMZ, Braunschweig, Germany). SMS-SB cells  
7 were a kind gift from Dr. Ralph B. Arlinghaus (The University of Texas MD Anderson  
8 Cancer Center, USA). BALL1 and Tanoue were purchased from the RIKEN BioResource  
9 Center (RIKEN, Japan). Cell lines were maintained in RPMI 1640 (Hyclone, Logan, UT,  
10 USA) supplemented with 2 mmol/l L-glutamine, 100  $\mu$ l/ml penicillin, 100  $\mu$ g/ml  
11 streptomycin (CellGro, Manassas, VA, USA) and 10% (REH, RS4;11, Nalm-6, SMS-SB,  
12 BALL-1, Tanoue and HPB-NULL) or 20% (Nalm-20, Nalm-21, Tom-1, RCH-ACV,  
13 Kasumi-2, 697) fetal bovine serum (FBS, Hyclone). Cell line authenticity was verified via  
14 STR fingerprinting.

15 Xenograft leukemia samples derived from untreated de novo B cell precursor ALL (B-  
16 ALL) patients were established using the NOD/SCID/huALL xenograft model as  
17 previously described<sup>1</sup>. The immunophenotype of primary patient samples was assessed  
18 according to the standards of the European Group for the Immunological  
19 Characterization of Leukemias.<sup>2</sup> Patient samples were obtained after informed consent  
20 and in accordance with the institution's ethical review board at the University of Ulm,  
21 Germany. For ex vivo experiments, xenograft-expanded BCP-ALL cells were isolated  
22 from leukemia bearing recipients and cultured in RPMI 1640 medium supplemented with  
23 10% fetal calf serum and 1% L-glutamine (Gibco Life Technologies, Darmstadt,  
24 Germany) at 37°C in humidified air/5% CO<sub>2</sub> as described earlier<sup>3,4</sup>. All xenograft

25 samples contained more than 90% of BCP-ALL cells as estimated by flow cytometry  
26 staining for human CD19 and/or CD45.

27 ICN12 xenograft-expanded cells were kindly provided by Dr. Markus Müschen  
28 (University of California, San Francisco). Cells were propagated in Alpha MEM  
29 supplemented with 20% fetal bovine serum, 100  $\mu$ l/ml penicillin, 100  $\mu$ g/ml streptomycin,  
30 GlutaMAX (Life Technologies) and Sodium-Pyruvate.

31 B-ALL patient samples for in vitro analysis of PRT318 efficacy were obtained, after  
32 informed consent from patients fulfilling diagnostic and immunophenotypic criteria for B-  
33 ALL at the Leukemia Department at MD Anderson Cancer Center. Patient consent for  
34 samples used in this study was obtained in accordance with the Declaration of Helsinki  
35 on protocols that were reviewed and approved by the Institutional Review Board at MD  
36 Anderson Cancer Center.

37 PRT318 (PRT060318) was kindly provided by Portola Pharmaceuticals (San Francisco,  
38 CA). LY294002, R406 and PRT062607 were purchased from Selleck Chemicals  
39 (Houston, TX).

40

#### 41 **CRISPR/Cas9 and FOXO1-AAA expression**

42 The CRISPR design tool (<http://crispr.mit.edu/>) was used to identify target specific  
43 sgRNA sequences. To ensure specificity only high-scoring (>50) sgRNA sequences  
44 were selected. To further reduce chances of off-target effects at least two distinct  
45 sgRNAs were used per target. Depending on the nature of the target proteins sgRNAs  
46 were then cloned into either one of two hSpCas9 containing backbone vectors. pX330  
47 backbone vector was used for targets where knockout could be verified via flow  
48 cytometry (SYK). sgRNA sequences targeting Ig $\mu$  and MYC were cloned into the PX458  
49 backbone vector. Both vectors were a kind gift from Feng Zhang (Addgene plasmid

50 #42230 and #48138).<sup>5</sup> Cells were transfected with the NEON™ Transfection System  
51 (Life Technologies) using predetermined conditions according to manufacturers  
52 instructions. Knockout of SYK was confirmed via flow cytometry. To verify knockout of  
53 MYC, GFP<sup>+</sup> cells were sorted (FACSJazz, BD) 48 h after electroporation and subjected  
54 to immunoblot analysis of MYC protein. Low Igμ surface expression levels forced us to  
55 verify successful Igμ-KO through a combination of GFP and surface Igμ staining. Briefly,  
56 cells were stained for surface Igμ 48 h after electroporation and assessed via flow  
57 cytometry. Gating on GFP<sup>+</sup> and Igμ<sup>-</sup> cells allowed the selection of Igμ-KO cells  
58 (Supplementary Figure 5). For all knockout experiments cells transfected with the  
59 respective backbone vector lacking target gRNA served as control.

60

## 61 **Western Blotting**

62 The following antibodies were used for immunoblot analysis: anti-Igα, anti-SYK, anti-  
63 pZAP-70 (T319)/pSYK (Y352), anti-SHP1, anti-BLNK, anti-BTK, anti-PLCγ2, anti-VAV1,  
64 anti-GAPDH, anti-AKT, anti-pAKT (S473), anti-ERK1/2, anti-pERK1/2 (T202/Y204), anti-  
65 CD19, anti-pCD19 (Y531), anti-FOXO1, anti-pFOXO1(T24)/pFOXO3a (T32)/pFOXO4  
66 (T28), anti-p27, anti-MYC (Cell Signaling Technologies, Danvers, MA); anti-LYN, anti-  
67 pLYN (Y396), anti-human IgM, anti-pBTK (Y223), anti-pVAV1 (Y174) (Abcam,  
68 Cambridge, MA). Cells were lysed in RIPA Buffer (Sigma Aldrich) containing PhosSTOP  
69 Phosphatase Inhibitor Cocktail and cComplete Protease Inhibitor Cocktail (Roche,  
70 Indianapolis, IN) and loaded onto NuPAGE® Novex® 4%-12% gradient gels (Life  
71 Technologies). After electrophoresis protein was transferred onto PVDF membranes  
72 (EMD Millipore, Darmstadt, Germany). Membranes were blocked for 1 h at room  
73 temperature with PBS containing 0.1% Tween (PBS-T) and either 5% BSA  
74 (phosphoproteins) or 5% Milk (total protein). Primary antibodies were diluted in blocking

75 solution at the recommended concentrations. Membranes were incubated overnight at 4  
76 °C. The following day membranes were washed three times for 10 min with PBS-T and  
77 incubated with species-specific HRP-linked secondary antibody (GE Healthcare) (diluted  
78 1:10000) for 1 h at room temperature. Protein was visualized via ECL detection (Pierce,  
79 Rockford, IL) according to supplier's instructions. Densitometric analysis was performed  
80 with ImageJ 1.48v (NIH).

81

## 82 **B-ALL xenograft mouse models**

83 In vivo xenograft experiments were conducted according to the national animal welfare  
84 law and approved by the appropriate authority (Regierungspräsidium Tübingen,  
85 Germany). Xenograft leukemia cells were transplanted onto female NOD/SCID mice  
86 (Jackson Laboratory/Charles River, MA) with a median age of 12 weeks. Following  
87 successful engraftment as indicated by more than 5% human CD19<sup>+</sup> cells in the  
88 peripheral blood, mice were randomized (5 per group) to receive either 30 mg/kg  
89 PRT318 in 5% Captisol or 5% Captisol twice daily via intraperitoneal injection.<sup>6,7</sup>  
90 According to pharmacokinetic analysis this dosing schedule results in an average steady  
91 state plasma concentration of 2.5 μM PRT318. Mice were killed 10 days after beginning  
92 of therapy and the amount of leukemia was assessed in bone marrow of left and right  
93 femur and tibia, peripheral blood, spleen, and central nervous system via flow cytometry.  
94 For survival analysis sublethally irradiated NOD/SCID mice were inoculated with 10<sup>6</sup>  
95 patient-derived leukemia cells (ICN12). After engraftment mice were randomized into  
96 groups of seven receiving either 100 mg/kg PRT062607 dissolved in H<sub>2</sub>O or H<sub>2</sub>O alone  
97 daily for 5 weeks. Mice exhibiting signs of overt leukemia were killed and the presence of  
98 leukemia was confirmed via flow cytometric analysis of hCD45<sup>+</sup> and hCD19<sup>+</sup> B-ALL blast

99 cells in the spleen and bone marrow. Experiments were performed in agreement with the  
100 appropriate authority at the University of California, San Francisco.

101

## 102 **Confocal microscopy**

103 Cells were synchronized through serum starvation for 12 h followed by treatment with 1  
104  $\mu$ M PRT318 or 20  $\mu$ M LY294002 for 6 h.  $10^6$  cells were then stained with CellTracker™  
105 Green CMFDA (Molecular Probes®, Life Technologies) according to manufacturers  
106 instructions and seeded onto coverslips (Ted Pella, Redding, CA) precoated with Poly-L-  
107 Ornithine (Sigma Aldrich). After 2 h Cells were fixed with 4% paraformaldehyde (Electron  
108 Microscopy Science, Hatfield, PA) for 10 min, washed once with PBS and then  
109 permeabilized for 30 min at room temperature with blocking/permeabilization solution (in  
110 PBS: 0.1% BSA w/v, 10% FBS, 0.3% v/v TRITON® X-100 (BIORAD, Hercules, CA)).  
111 Cells were incubated with FOXO1 antibody (Cell Signaling Technologies) diluted 1:100  
112 in blocking buffer (in PBS: 0.1% BSA w/v, 10% FBS) overnight at 4 °C. Following two  
113 washing steps cells were incubated with Alexa Fluor® 647-conjugated species specific  
114 secondary antibody (Molecular Probes®, Life Technologies) for 1.5 hours, washed again  
115 with PBS and mounted on coverslips with ProLong® Gold Antifade Mountant containing  
116 DAPI (Life Technologies). Cells were visualized on an Olympus FV1000 Laser Confocal  
117 Microscope. To determine the cellular distribution of FOXO1 captured images were  
118 analyzed with Slidebook 5.5v (Intelligent Imaging Innovations, Denver, CO).

**Supplemental Table 1.** Depicted are the genes most differentially expressed between pro-B and pre-B cells. GEP data was obtained from the NCBI GEO GEP database (GSE45460, Lee ST et al.). Expression data for pro-B and pre-B cells was averaged, followed by selection of the most differentially expressed genes (Cutoff:  $\pm 1.5 \log_2$ ).

| Up in pre-B | Pre-B – Pro-B (Ave.) | Down in pre-B | Pre-B – Pro-B (Ave.) |
|-------------|----------------------|---------------|----------------------|
| TCL1A       | 3.409484875          | DNTT          | -3.970801625         |
| ADAM23      | 3.39671975           | CD34          | -3.36188325          |
| CAMK2D      | 2.814519375          | ERG           | -3.2757345           |
| IRF4        | 2.776612625          | MYO5C         | -2.669143875         |
| TNFRSF17    | 2.75213025           | TCF7L2        | -2.322865125         |
| KLRK1       | 2.642934625          | GBP4          | -2.247708875         |
| KMO         | 2.631260875          | GIMAP4        | -2.246645            |
| FCRLA       | 2.63115675           | TSPAN7        | -2.158570875         |
| IKZF3       | 2.55654725           | MPO           | -2.05548725          |
| MYO3A       | 2.53473575           | ELK3          | -1.972691            |
| C13orf18    | 2.516602625          | CCND2         | -1.94018325          |
| CAMK4       | 2.373186875          | NPY           | -1.92724375          |
| ADARB1      | 2.345757875          | HPGDS         | -1.883255125         |
| IGKC        | 2.32370975           | SOCS2         | -1.8701565           |
| LYN         | 2.31681725           | IFITM3        | -1.842949375         |
| IGF2        | 2.28297525           | MS4A3         | -1.8368695           |
| KIAA1407    | 2.227569125          | PECAM1        | -1.82905075          |
| PLEKHA2     | 2.1536035            | CLC           | -1.823461375         |
| PLEKHG1     | 2.148306625          | SPINK2        | -1.81431             |
| ACSM3       | 2.145306625          | CD99          | -1.807950375         |
| C20orf103   | 2.143419             | LST1          | -1.79281475          |
| FCRL1       | 2.039112125          | AIF1          | -1.791898375         |
| PARP15      | 2.008830375          | SEMA6A        | -1.791159            |
| P2RY10      | 2.007818             | SPG20         | -1.7818535           |
| MPEG1       | 2.006921375          | GNG11         | -1.748639375         |
| BEST3       | 2.00088925           | IRAK3         | -1.74363775          |
| IGKC        | 1.997911625          | LRRC70        | -1.73812075          |
| SNX25       | 1.9600115            | NPCDR1        | -1.663513875         |
| IGKV3D-11   | 1.91861575           | PLEK          | -1.657183125         |
| FBXO25      | 1.917923125          | ATP2B4        | -1.63642575          |
| ATXN7L1     | 1.87686725           | C1orf54       | -1.62824175          |
| ABCB4       | 1.86574025           | TFPI          | -1.624913            |
| VNN2        | 1.86509025           | CD109         | -1.597598875         |
| CCDC112     | 1.85018125           | PRG2          | -1.591376625         |
| IGK@        | 1.834047375          | TNFRSF1A      | -1.589034375         |
| ROR1        | 1.83379075           | MYC           | -1.58497575          |

|              |             |           |              |
|--------------|-------------|-----------|--------------|
| WASF1        | 1.833325625 | CPA3      | -1.57857225  |
| KLHL14       | 1.825049125 | RNASE2    | -1.57695775  |
| GCET2        | 1.802085875 | PRKCH     | -1.57691225  |
| MTSS1        | 1.79681825  | P2RY14    | -1.571509625 |
| GPR160       | 1.784055    | SRGN      | -1.56066175  |
| LOC100133207 | 1.777806375 | LCP2      | -1.5517245   |
| CD180        | 1.774211    | NIPSNAP3B | -1.54061325  |
| LOC652493    | 1.765745375 | IGF2BP2   | -1.53788275  |
| HCK          | 1.75581725  | MEF2C     | -1.517344375 |
| SLAMF6       | 1.753883125 | FAM134B   | -1.500649625 |
| TCL6         | 1.7506425   |           |              |
| KCNA3        | 1.7410005   |           |              |
| C6orf192     | 1.691661875 |           |              |
| TMSB15A      | 1.685059875 |           |              |
| IKZF2        | 1.66435725  |           |              |
| BMP3         | 1.656715875 |           |              |
| MAP3K1       | 1.639192625 |           |              |
| CHP          | 1.637050625 |           |              |
| S1PR1        | 1.620007625 |           |              |
| VLDLR        | 1.607713875 |           |              |
| RNF144B      | 1.596045125 |           |              |
| ANXA2        | 1.59383625  |           |              |
| TFDP2        | 1.5924425   |           |              |
| IGHM         | 1.5602      |           |              |
| PCDH9        | 1.54592575  |           |              |
| MTMR1        | 1.540679    |           |              |
| VSIG6        | 1.533327    |           |              |
| KLRC4        | 1.526390125 |           |              |
| BIRC3        | 1.519319375 |           |              |
| AFF3         | 1.505205625 |           |              |

**Supplemental Table 2.** Genetics and immunophenotype of B-ALL cell lines and xenografts used in the study. Pro-B = cytoplasmic- $\text{Ig}\mu^-$ /surface  $\text{IgM}^-$ ; pre-B = cytoplasmic- $\text{Ig}\mu^+$ /surface  $\text{IgM}^-$ . n.a.: not available

| Name              | Fusiongenes     | Additional genetic abnormalities | Cytoplasmic $\text{Ig}\mu$ | Surface $\text{IgM}$ | pre-BCR | Developmental Stage |
|-------------------|-----------------|----------------------------------|----------------------------|----------------------|---------|---------------------|
| <b>Cell lines</b> |                 |                                  |                            |                      |         |                     |
| REH               | TEL/AML1        | n.a.                             | -                          | -                    | -       | pro-B               |
| RS4;11            | MLL/AF4         | hyperdiploid, +8, +18            | -                          | -                    | -       | pro-B               |
| SFO3              | -               | n.a.                             | -                          | -                    | -       | pro-B               |
| Nalm-20           | BCR/ABL         | hyperdiploid, +8, +8             | -                          | -                    | -       | pro-B               |
| Nalm-21           | BCR/ABL         | near diploid, -Y, +8             | -                          | +                    | -       | pro-B               |
| Tom-1             | BCR/ABL         | hyperdiploid, +8,+16             | -                          | -                    | -       | pro-B               |
| RCH-ACV           | TCF3/PBX1       | hyperdiploid, +8,+16             | +                          | -                    | +       | pre-B               |
| ICN12             | TCF3/PBX1       | n.a.                             | +                          | -                    | +       | pre-B               |
| SMS-SB            | none            | n.a.                             | +                          | -                    | +       | pre-B               |
| Nalm-6            | t(5;12)         | diploid                          | +                          | -                    | +       | pre-B               |
| Tanoue            | unknown         | n.a.                             | +                          | +                    | -       | mature-B            |
| <b>Xenografts</b> |                 |                                  |                            |                      |         |                     |
| X002              | none            | n.a.                             | -                          | -                    | -       | pro-B               |
| X089              | none            | n.a.                             | -                          | -                    | -       | pro-B               |
| X112              | none            | n.a.                             | -                          | -                    | -       | pro-B               |
| X068              | none            | n.a.                             | -                          | -                    | -       | pro-B               |
| X018              | none            | n.a.                             | +                          | -                    | +       | pre-B               |
| X116              | none            | n.a.                             | +                          | -                    | +       | pre-B               |
| X006              | none            | <i>IKZF1 del ex2</i>             | +                          | -                    | +       | pre-B               |
| X120              | <i>E2A/PBX1</i> | n.a.                             | +                          | -                    | +       | pre-B               |
| X134              | none            | <i>P2RY8/CRLF2</i>               | +                          | -                    | +       | pre-B               |
| X135              | BCR/ABL         | n.a.                             | +                          | -                    | +       | pre-B               |



**Supplemental Table 3.** Characteristics of B-ALL primary patient samples.

| Sample      | Diagnosis      | Age at Diagnosis | Immunophenotype                                                                               | Cytogenetics                                                                                              | Fusiongenes | Previous Therapies                                             |
|-------------|----------------|------------------|-----------------------------------------------------------------------------------------------|-----------------------------------------------------------------------------------------------------------|-------------|----------------------------------------------------------------|
| pre-B ALL 1 | relapsed B-ALL | 18y              | CD10+, CD19+, CD22+, CD34+, CD38+, CD52+, cytoCD79a+, CD123+, <b>cytoIgμ+</b>                 | Hypodiploid, 45,XY,-7                                                                                     | -           | Augmented-BFM, Blinatumomab, Coltuximab, hyper-CVAD+everolimus |
| pre-B ALL 2 | relapsed B-ALL | 66y              | CD10+, CD19+, CD20+(dim), CD22+(dim), <b>cytoIgμ+</b> , CD38+, CD52+, CD81+, CD38+            | Hyperdiploid, 49~51,XX, add(3)(q29), del(4)(q21q35), +6, del(6)(q21q25)x2, +2~5mar[cp4                    | -           | Hyper-CVAD+rituximab, Coltuximab                               |
| pro-B ALL 1 | relapsed B-ALL | 20y              | CD10+, CD13+(partial), CD20+(partial), CD22+, CD33+, CD34+, CD38+, CD45+, CD52+, CD58+, CD81+ | Hyperdiploid, 49,XY, +X, add(3)(p25), add(7)(p11.2), add(9)(p24), dup(11)(q13q23), +14, del(17)(q23), +21 | -           | Augmented hyper-CVAD, FLAM, Blinatumomab, Coltuximab           |
| pro-B ALL 2 | relapsed B-ALL | 60y              | CD19+, CD20+, CD10+, HLA-DR+, CD34+, CD38+, TdT+                                              | Hyperdiploid, 53,XX, +X, del(4)(q33), +8, t(9;22)(q34;q11.2), +10, +15, +21, +der(22)t(9;22)              | BCR-ABL     | Hyper-CVAD+ dasatinib                                          |

**Supplemental Table 4.** CRISPR/Cas9 guide RNA (gRNA) sequences.

| Target   | Cell Line | gRNA1 (forward)           | gRNA2 (forward)           | gRNA3 (forward)          | Cas9 Backbone Plasmid         | target region |
|----------|-----------|---------------------------|---------------------------|--------------------------|-------------------------------|---------------|
| Ig $\mu$ | RCH-ACV   | GTGGATGGGAT<br>GGATCAACGC | GTGCTATGCAT<br>TGGGTGCGCC | -                        | hSpCas9(BB)-2A-GFP<br>(PX458) | VDJ-Region    |
| Ig $\mu$ | SMS-SB    | GCTCTGTGACC<br>GCCGCAGACA | GTTGGGAGTAT<br>CTATCATAGT | -                        | hSpCas9(BB)-2A-GFP<br>(PX458) | VDJ-Region    |
| SYK      | -         | GTTTCGGCAAC<br>ATCACCCGGG | GACCATCGAGC<br>GGGAGCTGAA | GAAGATTACCT<br>GGTCCAGGG | hSpCas9(BB)-2A-GFP<br>(PX458) | Exon 1        |
| MYC      | -         | GTATTTCTACT<br>GCGACGAGG  | GCCGTATTTCT<br>ACTGCGACG  | GCTGCACCGAG<br>TCGTAGTCG | hSpCas9(BB)-2A-GFP<br>(PX458) | Exon 2        |

**Supplemental Table 5.** FOXO1-3A specific gene set used to identify active pre-BCR signaling in pre-B ALL cases of the St. Jude GEP dataset.

| FOXO1-3A_UP gene set (Cutoff: 2) |              |         |
|----------------------------------|--------------|---------|
| CD247                            | DUSP10       | CDH15   |
| TXNIP                            | TM6SF1       | PLA2G4C |
| LOC730101                        | KIAA1683     | GNG11   |
| IFIT2                            | MERTK        | TP63    |
| ARPP-21                          | FNDC5        |         |
| ACTA2                            | LRRC3B       |         |
| ATP9A                            | KLHL2        |         |
| CSMD1                            | IL1B         |         |
| ANGPT2                           | DDIT3        |         |
| OSCAR                            | CCPG1        |         |
| LOC285501                        | CYTL1        |         |
| PLS3                             | ANG          |         |
| CASP1                            | LOC100131707 |         |
| MEI1                             | TMEM71       |         |
| LITAF                            | LY6H         |         |
| MUC6                             | NRG3         |         |
| TGFB111                          | LDHD         |         |
| BTG2                             | PADI4        |         |
| NR3C1                            | XAGE1        |         |
| LOC728253                        | FAIM3        |         |
| GBP4                             | EFNA1        |         |
| FOXP1                            | DYRK2        |         |
| SORBS1                           | TRPS1        |         |
| AFF3                             | BCL6B        |         |
| PPP1R15A                         | ISG20        |         |
| COL6A3                           | ICA1         |         |
| SPTA1                            | HS.400256    |         |
| TNFAIP3                          | GPR160       |         |
| HIST2H4A                         | SHISA2       |         |
| DNAJB9                           | CD69         |         |
| LDB2                             | TACC2        |         |
| TSC22D3                          | ARRDC5       |         |
| LOC90925                         | GIMAP4       |         |
| GAB1                             | CSAG1        |         |
| PP14571                          | DPEP1        |         |
| RGS1                             | RASD1        |         |
| LOC100128888                     | C10ORF10     |         |

**Supplemental Table 6.** Genes most differentially expressed in pre-B and non-pre B ALL (> 2 fold change). Log2 transformed gene expression values were averaged for each group and then subtracted (pre-B – pro-B).

| High in pre-B ALL |                    |           |                    | Low in pre-B ALL |                    |            |                    |
|-------------------|--------------------|-----------|--------------------|------------------|--------------------|------------|--------------------|
| Gene ID           | Fold change (log2) | Gene ID   | Fold change (log2) | Gene ID          | Fold change (log2) | Gene ID    | Fold change (log2) |
| NME3              | 1.00               | RAG2      | 1.17               | GNG11            | -3.48              | TMEM156    | -1.66              |
| ARNTL2            | 1.00               | TGFBR2    | 1.17               | CYTL1            | -3.15              | P2RY14     | -1.66              |
| COCH              | 1.01               | LRRC15    | 1.18               | STK32B           | -2.95              | PIEZO1     | -1.64              |
| ZAP70             | 1.01               | C11orf49  | 1.18               | SOCS2            | -2.92              | GPR56      | -1.63              |
| DACT1             | 1.01               | BCAT1     | 1.18               | POU4F1           | -2.82              | IFIT1      | -1.62              |
| LIPC              | 1.02               | MERTK     | 1.18               | IFI44L           | -2.72              | ECM1       | -1.61              |
| ADAM23            | 1.02               | HIP1R     | 1.18               | TSPAN7           | -2.71              | H2BFS      | -1.60              |
| GALNT14           | 1.02               | IGLL3P    | 1.18               | ITGA6            | -2.44              | FSCN1      | -1.60              |
| PRL               | 1.02               | MT1X      | 1.18               | MRC1             | -2.43              | TNFRSF21   | -1.59              |
| TSSC1             | 1.02               | LGALS1    | 1.19               | NPR1             | -2.42              | DNTT       | -1.59              |
| TCL6              | 1.03               | KIAA0922  | 1.19               | CYB5R2           | -2.37              | RAG1       | -1.59              |
| FAIM              | 1.03               | BLK       | 1.19               | WDFY3            | -2.36              | SLC2A5     | -1.59              |
| ADK               | 1.03               | MTX2      | 1.20               | EGFL7            | -2.26              | EFNB1      | -1.56              |
| ITM2C             | 1.03               | EPHA3     | 1.20               | EFNA1            | -2.23              | CD69       | -1.55              |
| DPY19L2P2         | 1.04               | TACC2     | 1.22               | H1F0             | -2.22              | NPDC1      | -1.53              |
| DYNC2LI1          | 1.04               | GP5       | 1.24               | EPHA7            | -2.13              | CTGF       | -1.52              |
| DOCK10            | 1.04               | ODZ4      | 1.24               | AIF1             | -2.09              | MAN1A1     | -1.52              |
| ROBO1             | 1.05               | CTNBL1    | 1.24               | CD99             | -1.99              | ITPR1      | -1.51              |
| PARP1             | 1.05               | PLS3      | 1.25               | ST3GAL6          | -1.98              | MX1        | -1.50              |
| ACCN1             | 1.06               | MAPKBP1   | 1.26               | ELK3             | -1.97              | SCN3A      | -1.49              |
| TUBB2A            | 1.08               | LINC00094 | 1.26               | BMP2             | -1.92              | PLXND1     | -1.49              |
| DSTN              | 1.09               | PSEN2     | 1.26               | LGMN             | -1.90              | TERF2      | -1.48              |
| PSAT1             | 1.10               | PBK       | 1.26               | CD34             | -1.89              | GIMAP4     | -1.47              |
| QRSL1             | 1.10               | EPB41L2   | 1.26               | PDE4B            | -1.86              | KIAA0226L  | -1.46              |
| KIF21B            | 1.10               | SIT1      | 1.27               | ALOX5            | -1.81              | BANK1      | -1.46              |
| IGHM              | 1.10               | SEMA4C    | 1.27               | PLAG1            | -1.80              | FKBP5      | -1.45              |
| ATP1A3            | 1.11               | PHACTR1   | 1.28               | SERINC5          | -1.79              | SEPP1      | -1.45              |
| PKIG              | 1.11               | UGT8      | 1.29               | SH3BP5           | -1.78              | CSF3R      | -1.45              |
| CTSC              | 1.11               | BACH2     | 1.29               | USP18            | -1.78              | MME        | -1.42              |
| CD38              | 1.11               | VASH2     | 1.29               | LTB              | -1.77              | NR3C2      | -1.42              |
| PPM1E             | 1.12               | NAV2      | 1.29               | SMAD1            | -1.76              | C1orf38    | -1.40              |
| WASF1             | 1.13               | SORBS1    | 1.31               | LST1             | -1.72              | LPAR6      | -1.39              |
| VIPR2             | 1.13               | FAM3C     | 1.31               | KCNK12           | -1.70              | CSGALNACT1 | -1.39              |
| ALDH1A1           | 1.14               | CRIP1     | 1.32               | TIE1             | -1.70              | SLC35E3    | -1.39              |
| ZNF167            | 1.14               | RGS2      | 1.32               | IRAK3            | -1.69              | BAALC      | -1.38              |

|         |      |           |      |          |       |           |       |
|---------|------|-----------|------|----------|-------|-----------|-------|
| TUBB6   | 1.14 | CLEC11A   | 1.32 | STAG3    | -1.68 | MN1       | -1.38 |
| PPPDE1  | 1.15 | TMSB15A   | 1.32 | TBC1D9   | -1.67 | KCNA5     | -1.37 |
| CD96    | 1.16 | SYT1      | 1.33 | SMAGP    | -1.66 | FHIT      | -1.36 |
| GATM    | 1.16 | CLEC2D    | 1.35 | NPY      | -1.66 | SLC27A3   | -1.35 |
| PCDH9   | 1.36 | FGF9      | 2.08 | MYO1B    | -1.31 | ALOX5AP   | -1.10 |
| RORB    | 1.36 | IGFBP7    | 2.13 | PROM1    | -1.31 | HIST1H2BH | -1.09 |
| SPAG6   | 1.38 | FAT1      | 2.17 | XBP1     | -1.31 | RNASET2   | -1.09 |
| CD72    | 1.39 | RHOBTB1   | 2.18 | PECAM1   | -1.30 | HHEX      | -1.08 |
| SPIB    | 1.39 | TRIB2     | 2.20 | IPCEF1   | -1.29 | HIST1H2AG | -1.07 |
| CCDC69  | 1.39 | SLC27A2   | 2.34 | IFI44    | -1.28 | ARMCX2    | -1.07 |
| KCNJ12  | 1.40 | BIK       | 2.57 | FAM49A   | -1.27 | FOS       | -1.07 |
| MYBPH   | 1.42 | PRKCZ     | 2.61 | GIMAP6   | -1.26 | PTPLA     | -1.06 |
| ODC1    | 1.43 | ADARB1    | 2.72 | CD1C     | -1.26 | SH3TC1    | -1.06 |
| ARL4C   | 1.43 | NYNRIN    | 2.91 | B4GALT6  | -1.25 | ETS2      | -1.06 |
| RNF144A | 1.46 | PBX1      | 3.30 | ISG20    | -1.24 | DSE       | -1.06 |
| MAGEF1  | 1.46 | C20orf103 | 3.65 | TNFRSF1A | -1.24 | KCTD12    | -1.05 |
| ELOVL2  | 1.47 | FHOD3     | 1.96 | CCND2    | -1.24 | GSN       | -1.05 |
| RASAL1  | 1.47 | WNT16     | 1.97 | C15orf5  | -1.23 | SERPINB6  | -1.04 |
| AEBP1   | 1.49 | IL12RB2   | 2.01 | SEMA6A   | -1.23 | YES1      | -1.04 |
| POLM    | 1.49 | LRMP      | 2.05 | CXCR7    | -1.22 | DAB2      | -1.03 |
| ITGA8   | 1.50 | CCDC165   | 2.05 | TCEAL4   | -1.22 | PLSCR1    | -1.03 |
| KCNMB3  | 1.52 | ROR1      | 2.07 | PRKCH    | -1.21 | SYNGR1    | -1.03 |
| TMEM121 | 1.58 |           |      | CDKN1A   | -1.21 | SESN1     | -1.02 |
| QPRT    | 1.58 |           |      | DRAM1    | -1.20 | CLEC2B    | -1.02 |
| SLAMF1  | 1.61 |           |      | ENOSF1   | -1.20 | NEDD9     | -1.01 |
| KCNA3   | 1.62 |           |      | PCTP     | -1.20 | GPR171    | -1.01 |
| NFATC4  | 1.62 |           |      | RECK     | -1.19 | HIST1H2BK | -1.11 |
| UCK2    | 1.72 |           |      | DHRS3    | -1.18 | AKR1C3    | -1.11 |
| SYNPO   | 1.73 |           |      | IL3RA    | -1.16 | CD97      | -1.11 |
| GLDC    | 1.76 |           |      | RRAS2    | -1.16 | PEG10     | -1.10 |
| SLC2A6  | 1.76 |           |      | C13orf15 | -1.16 | PSD3      | -1.10 |
| IGLL1   | 1.76 |           |      | FHL1     | -1.15 | STAP1     | -1.10 |
| CCDC81  | 1.76 |           |      | FUCA1    | -1.15 |           |       |
| NRGN    | 1.77 |           |      | MYRIP    | -1.14 |           |       |
| AOX1    | 1.80 |           |      | FCGRT    | -1.14 |           |       |
| MAP3K1  | 1.85 |           |      | FLT3     | -1.13 |           |       |
| LAMA5   | 1.92 |           |      | NFE2     | -1.12 |           |       |
| SH3BP4  | 1.94 |           |      | GNA15    | -1.12 |           |       |
| NID2    | 1.96 |           |      | IFI27    | -1.12 |           |       |

**Supplemental Table 7.** Genes most differentially expressed (>2 absolute fold change) in RCH-ACV and SMS-SB after *Igμ* KO.

| Downregulated<br>ILMN_Gene | RCH-ACV        |                | SMS-SB         |                | Average |
|----------------------------|----------------|----------------|----------------|----------------|---------|
|                            | <i>Igμ</i> KO1 | <i>Igμ</i> KO2 | <i>Igμ</i> KO1 | <i>Igμ</i> KO2 |         |
| PRICKLE1                   | -2.4682        | -2.4682        | -1.3646        | -2.1662        | -2.1168 |
| ALOX5AP                    | -1.3968        | -1.1217        | -1.9901        | -2.5903        | -1.7747 |
| SMAGP                      | -1.4951        | -0.9479        | -1.8569        | -2.7940        | -1.7735 |
| ITGB7                      | -1.6519        | -2.2220        | -1.4468        | -1.6591        | -1.7449 |
| IL4I1                      | -0.8086        | -1.8951        | -1.7411        | -1.7411        | -1.5465 |
| RASAL3                     | -1.2238        | -1.8041        | -1.4139        | -1.6062        | -1.5120 |
| ELOVL6                     | -1.2493        | -2.0233        | -0.9935        | -1.3509        | -1.4043 |
| CSPG4                      | -0.7698        | -0.7698        | -1.5534        | -2.4805        | -1.3934 |
| PTPN6                      | -1.0967        | -1.1581        | -1.2496        | -2.0237        | -1.3820 |
| TNF                        | -1.2640        | -1.4302        | -1.2595        | -1.5729        | -1.3817 |
| TLR10                      | -1.0476        | -1.4359        | -1.3949        | -1.6438        | -1.3806 |
| PPP1R16B                   | -1.0634        | -1.3642        | -1.3249        | -1.7220        | -1.3686 |
| ITGB2                      | -1.3442        | -1.4571        | -1.0296        | -1.6161        | -1.3618 |
| VGF                        | -0.6741        | -1.1776        | -1.4916        | -2.0603        | -1.3509 |
| CSF1R                      | -0.8774        | -1.2049        | -1.6533        | -1.6533        | -1.3473 |
| C19ORF51                   | -2.1405        | -1.0472        | -0.7541        | -1.3866        | -1.3321 |
| TMC6                       | -1.2948        | -1.4101        | -0.9049        | -1.6617        | -1.3179 |
| PLEK                       | -1.6054        | -1.5277        | -0.9854        | -1.0650        | -1.2959 |
| EYA4                       | -1.3918        | -1.8898        | -0.9366        | -0.9366        | -1.2887 |
| TIMP1                      | -1.2227        | -0.9938        | -1.4437        | -1.4777        | -1.2845 |
| KCNJ16                     | -1.0740        | -1.0290        | -1.3597        | -1.6563        | -1.2798 |
| RASAL3                     | -0.7041        | -1.9176        | -1.0542        | -1.4309        | -1.2767 |
| SLC39A14                   | -1.0532        | -1.7159        | -0.8814        | -1.3625        | -1.2533 |
| LIMS2                      | -1.4033        | -1.1976        | -0.9415        | -1.2957        | -1.2095 |
| EHD4                       | -0.8046        | -2.0628        | -0.9233        | -1.0343        | -1.2062 |
| SLC17A9                    | -1.1642        | -1.1371        | -0.9180        | -1.4298        | -1.1623 |
| NPW                        | -1.5808        | -1.3462        | -0.6691        | -0.9895        | -1.1464 |
| ELOVL6                     | -1.1441        | -1.4841        | -1.0100        | -0.9357        | -1.1435 |
| POLR3G                     | -0.9626        | -1.5587        | -0.8686        | -1.1653        | -1.1388 |
| RINL                       | -0.8970        | -0.7945        | -1.3339        | -1.5001        | -1.1314 |
| STEAP3                     | -1.4163        | -1.2707        | -0.7765        | -1.0552        | -1.1297 |
| SLC7A2                     | -1.0939        | -1.5471        | -0.8642        | -0.9942        | -1.1249 |
| TRIB1                      | -0.8931        | -1.6978        | -0.8961        | -0.8961        | -1.0958 |
| HBEGF                      | -0.6716        | -0.8192        | -1.3500        | -1.5420        | -1.0957 |
| COTL1                      | -1.2271        | -1.2348        | -1.2081        | -0.6986        | -1.0922 |
| SMAGP                      | -0.9926        | -0.9888        | -0.8123        | -1.5110        | -1.0762 |
| CST7                       | -1.4671        | -1.0464        | -0.8858        | -0.8858        | -1.0713 |
| SLAMF1                     | -0.8998        | -0.9857        | -1.1254        | -1.2657        | -1.0691 |
| LOC644590                  | -0.9093        | -0.9919        | -1.3325        | -0.9913        | -1.0562 |
| SLC29A1                    | -0.9383        | -0.6162        | -1.2662        | -1.3966        | -1.0543 |

|          |         |         |         |         |         |
|----------|---------|---------|---------|---------|---------|
| RRP12    | -1.2584 | -1.4194 | -0.7135 | -0.8161 | -1.0519 |
| STOM     | -1.1731 | -1.2855 | -0.6963 | -1.0091 | -1.0410 |
| HS.10862 | -1.1196 | -1.4995 | -0.7061 | -0.8325 | -1.0394 |
| IFI30    | -1.2246 | -0.7233 | -1.1039 | -1.0944 | -1.0365 |
| MYBBP1A  | -1.1876 | -1.2488 | -1.0343 | -0.6683 | -1.0348 |
| DHCR7    | -0.7411 | -1.1430 | -1.1139 | -1.1176 | -1.0289 |
| LY9      | -0.8167 | -0.8167 | -0.9188 | -1.5057 | -1.0145 |
| DYNC111  | -0.7656 | -0.7656 | -1.2669 | -1.2394 | -1.0094 |

| <b>Upregulated</b> | <b>RCH-ACV</b> |               | <b>SMS-SB</b> |               |                |
|--------------------|----------------|---------------|---------------|---------------|----------------|
| <b>ILMN_Gene</b>   | <b>Igμ KO1</b> | <b>IgμKO2</b> | <b>IgμKO1</b> | <b>IgμKO2</b> | <b>Average</b> |
| FNDC5              | 2.2593         | 2.1283        | 2.8788        | 2.8818        | 2.5371         |
| LOC100129878       | 1.5796         | 2.0268        | 2.4302        | 2.5279        | 2.1411         |
| LOC648868          | 1.2585         | 1.7784        | 2.7918        | 2.5315        | 2.0901         |
| LOC100132810       | 1.5332         | 1.7873        | 2.2954        | 2.4221        | 2.0095         |
| C10ORF10           | 2.3614         | 2.1426        | 1.6997        | 1.7668        | 1.9926         |
| MGC24125           | 1.5327         | 1.6009        | 1.9174        | 2.5291        | 1.8950         |
| HPS4               | 1.4577         | 1.9099        | 1.7760        | 2.1046        | 1.8120         |
| CCM2               | 1.6189         | 2.3456        | 1.3698        | 1.6741        | 1.7521         |
| LOC728175          | 1.2248         | 1.5160        | 1.7613        | 2.2877        | 1.6974         |
| NAV2               | 0.8713         | 1.1514        | 2.3397        | 2.3993        | 1.6904         |
| GZMK               | 1.1728         | 1.3650        | 2.0699        | 2.0610        | 1.6672         |
| TNFRSF17           | 0.8987         | 1.5593        | 2.0726        | 2.0427        | 1.6433         |
| SELL               | 1.1759         | 1.8934        | 1.5754        | 1.8812        | 1.6315         |
| LOC100128888       | 1.8935         | 1.5313        | 1.4021        | 1.6428        | 1.6175         |
| BACH2              | 1.1386         | 1.4068        | 1.7984        | 2.1126        | 1.6141         |
| BACH2              | 1.7277         | 1.1783        | 1.7757        | 1.7720        | 1.6134         |
| GAB1               | 2.2639         | 1.6955        | 1.0751        | 1.2335        | 1.5670         |
| DTX1               | 1.5038         | 1.3609        | 1.6820        | 1.6977        | 1.5611         |
| ARPP-21            | 0.8353         | 0.9694        | 2.1523        | 2.1593        | 1.5291         |
| CTGF               | 1.6035         | 1.3915        | 1.5649        | 1.5392        | 1.5248         |
| YPEL3              | 1.2547         | 1.9619        | 1.5088        | 1.3507        | 1.5190         |
| SPTA1              | 1.3026         | 1.1083        | 1.6575        | 1.8664        | 1.4837         |
| ARPP-21            | 1.2536         | 0.8265        | 1.8098        | 2.0331        | 1.4808         |
| BACH2              | 1.2948         | 1.1759        | 1.6165        | 1.7140        | 1.4503         |
| SH2D4B             | 1.4844         | 1.0232        | 1.5360        | 1.7226        | 1.4416         |
| MPP1               | 1.1293         | 1.2130        | 1.5143        | 1.7414        | 1.3995         |
| SOCS2              | 1.1617         | 1.3497        | 1.4170        | 1.5970        | 1.3814         |
| DPEP1              | 1.9022         | 2.0094        | 0.7531        | 0.8462        | 1.3777         |
| LOC645993          | 1.2254         | 1.7737        | 1.2709        | 1.2263        | 1.3741         |
| BTNL3              | 1.2815         | 1.6512        | 1.2827        | 1.2447        | 1.3650         |
| MXD3               | 1.1608         | 1.6635        | 1.3024        | 1.2955        | 1.3556         |
| CLEC2D             | 1.0370         | 1.0688        | 1.6579        | 1.6322        | 1.3490         |
| GBP4               | 1.6559         | 1.3792        | 1.1601        | 1.1589        | 1.3386         |

|              |        |        |        |        |        |
|--------------|--------|--------|--------|--------|--------|
| ARPP-21      | 1.2087 | 0.6234 | 1.6283 | 1.8807 | 1.3353 |
| LOC100129878 | 1.5281 | 2.0248 | 0.7177 | 1.0470 | 1.3294 |
| RCAN1        | 1.4686 | 1.9379 | 0.7175 | 1.1809 | 1.3262 |
| LOC399804    | 0.7415 | 0.9880 | 1.7927 | 1.7343 | 1.3141 |
| ARPP-21      | 0.7990 | 0.8684 | 1.8735 | 1.7054 | 1.3116 |
| NYNRIN       | 0.9031 | 1.0356 | 1.5551 | 1.7193 | 1.3033 |
| HIP1R        | 1.1500 | 1.7627 | 1.0630 | 1.2102 | 1.2965 |
| S1PR4        | 0.9341 | 1.1220 | 1.4721 | 1.5792 | 1.2768 |
| HS.434957    | 1.4684 | 0.9833 | 1.1566 | 1.3502 | 1.2396 |
| MYLK         | 1.2675 | 1.0441 | 1.1053 | 1.5371 | 1.2385 |
| RCAN1        | 1.3266 | 1.2087 | 1.0881 | 1.3130 | 1.2341 |
| GAB1         | 1.4392 | 1.7006 | 0.6152 | 1.1628 | 1.2295 |
| C20ORF103    | 1.2471 | 1.6403 | 0.9310 | 1.0388 | 1.2143 |
| LRRC26       | 1.0806 | 1.4062 | 1.1859 | 1.1795 | 1.2130 |
| RASD1        | 0.9218 | 1.1061 | 1.3005 | 1.4842 | 1.2032 |
| CMTM8        | 0.9765 | 1.2378 | 1.2015 | 1.3321 | 1.1870 |
| RASAL1       | 1.1037 | 1.0351 | 1.2502 | 1.3162 | 1.1763 |
| YPEL5        | 1.4437 | 1.2492 | 0.8362 | 1.1190 | 1.1620 |
| CXCR4        | 0.9661 | 1.3879 | 0.8356 | 1.3936 | 1.1458 |
| LOC90925     | 1.2295 | 1.5326 | 0.8226 | 0.9699 | 1.1387 |
| LOC389816    | 0.9506 | 1.3491 | 1.1107 | 1.1020 | 1.1281 |
| SHROOM3      | 0.9526 | 0.7612 | 1.3478 | 1.4462 | 1.1270 |
| RAG1         | 1.2766 | 1.2470 | 1.0561 | 0.9267 | 1.1266 |
| LOC100130503 | 1.1988 | 0.6834 | 1.2245 | 1.3940 | 1.1252 |
| MME          | 1.5357 | 1.2703 | 0.7432 | 0.9207 | 1.1175 |
| KLHL24       | 1.1397 | 1.1342 | 1.1570 | 1.0190 | 1.1125 |
| TMEM71       | 0.6785 | 1.0861 | 1.3109 | 1.3562 | 1.1079 |
| LOC100130123 | 1.2800 | 0.6672 | 1.0794 | 1.3391 | 1.0914 |
| ZFP36L2      | 0.7961 | 1.0503 | 1.0072 | 1.4731 | 1.0817 |
| AKAP12       | 1.1064 | 0.6663 | 0.9463 | 1.5907 | 1.0774 |
| GPR137C      | 1.4334 | 0.9614 | 0.6372 | 1.2535 | 1.0714 |
| YPEL1        | 0.9821 | 0.8289 | 1.1424 | 1.3110 | 1.0661 |
| TXNIP        | 1.4691 | 1.0400 | 0.8289 | 0.9222 | 1.0651 |
| RAB37        | 0.8603 | 1.3944 | 0.6852 | 1.3159 | 1.0639 |
| CXCR4        | 0.9756 | 1.1435 | 0.9389 | 1.1976 | 1.0639 |
| SOCS2        | 0.9893 | 0.9816 | 1.0863 | 1.1501 | 1.0518 |
| PIM1         | 1.2959 | 0.9938 | 1.0427 | 0.8622 | 1.0486 |
| LOC100130476 | 0.6085 | 1.3336 | 1.0580 | 1.1258 | 1.0315 |
| LOC100130503 | 0.7344 | 0.6212 | 1.0273 | 1.7402 | 1.0308 |
| AXUD1        | 1.3704 | 0.6926 | 0.9538 | 1.0922 | 1.0272 |
| LOC730101    | 1.1103 | 0.8570 | 1.0736 | 1.0222 | 1.0157 |
| CLEC2D       | 0.8102 | 1.0686 | 0.8777 | 1.2784 | 1.0087 |
| ADCY9        | 0.6181 | 0.6417 | 1.3321 | 1.4296 | 1.0054 |



# Supplemental Figure 1

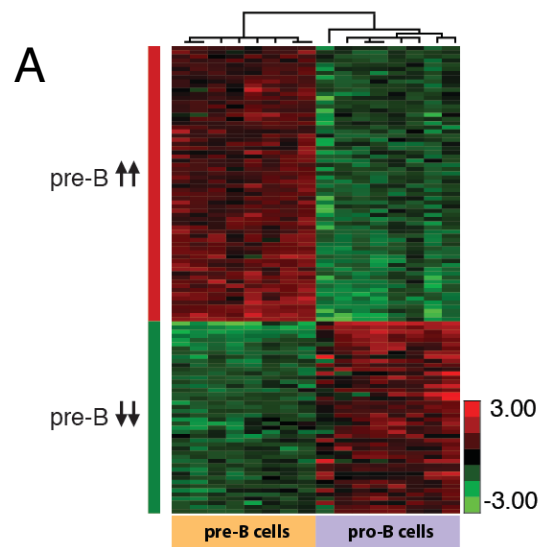

**B**

Frequency of pre-B ALL phenotype by subgroup

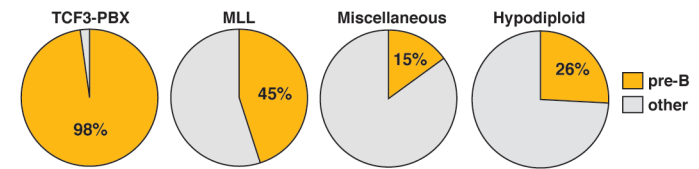

**C**

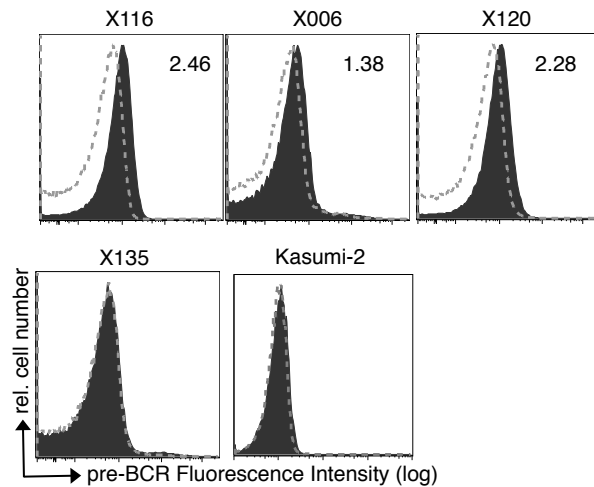

**D**

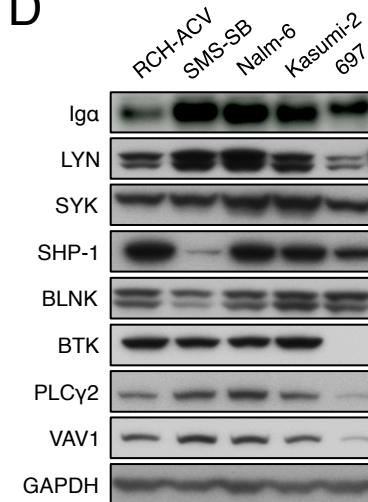

**Supplemental Figure 1.** (A) Genes distinguishing normal pro-B from pre-B cells. Gene expression data derives from the NCBI GEO database (GSE45460, Lee ST et al. 2012). Heatmap depicts log<sub>2</sub>-transformed, mean-centered expression values. (B) Frequency of the pre-B ALL phenotype by cytogenetic subgroup (C) Pre-BCR expression in xenograft cells and cell lines. (D) Expression of pre-BCR signaling molecules in pre-B ALL cells.

# Supplemental Figure 1

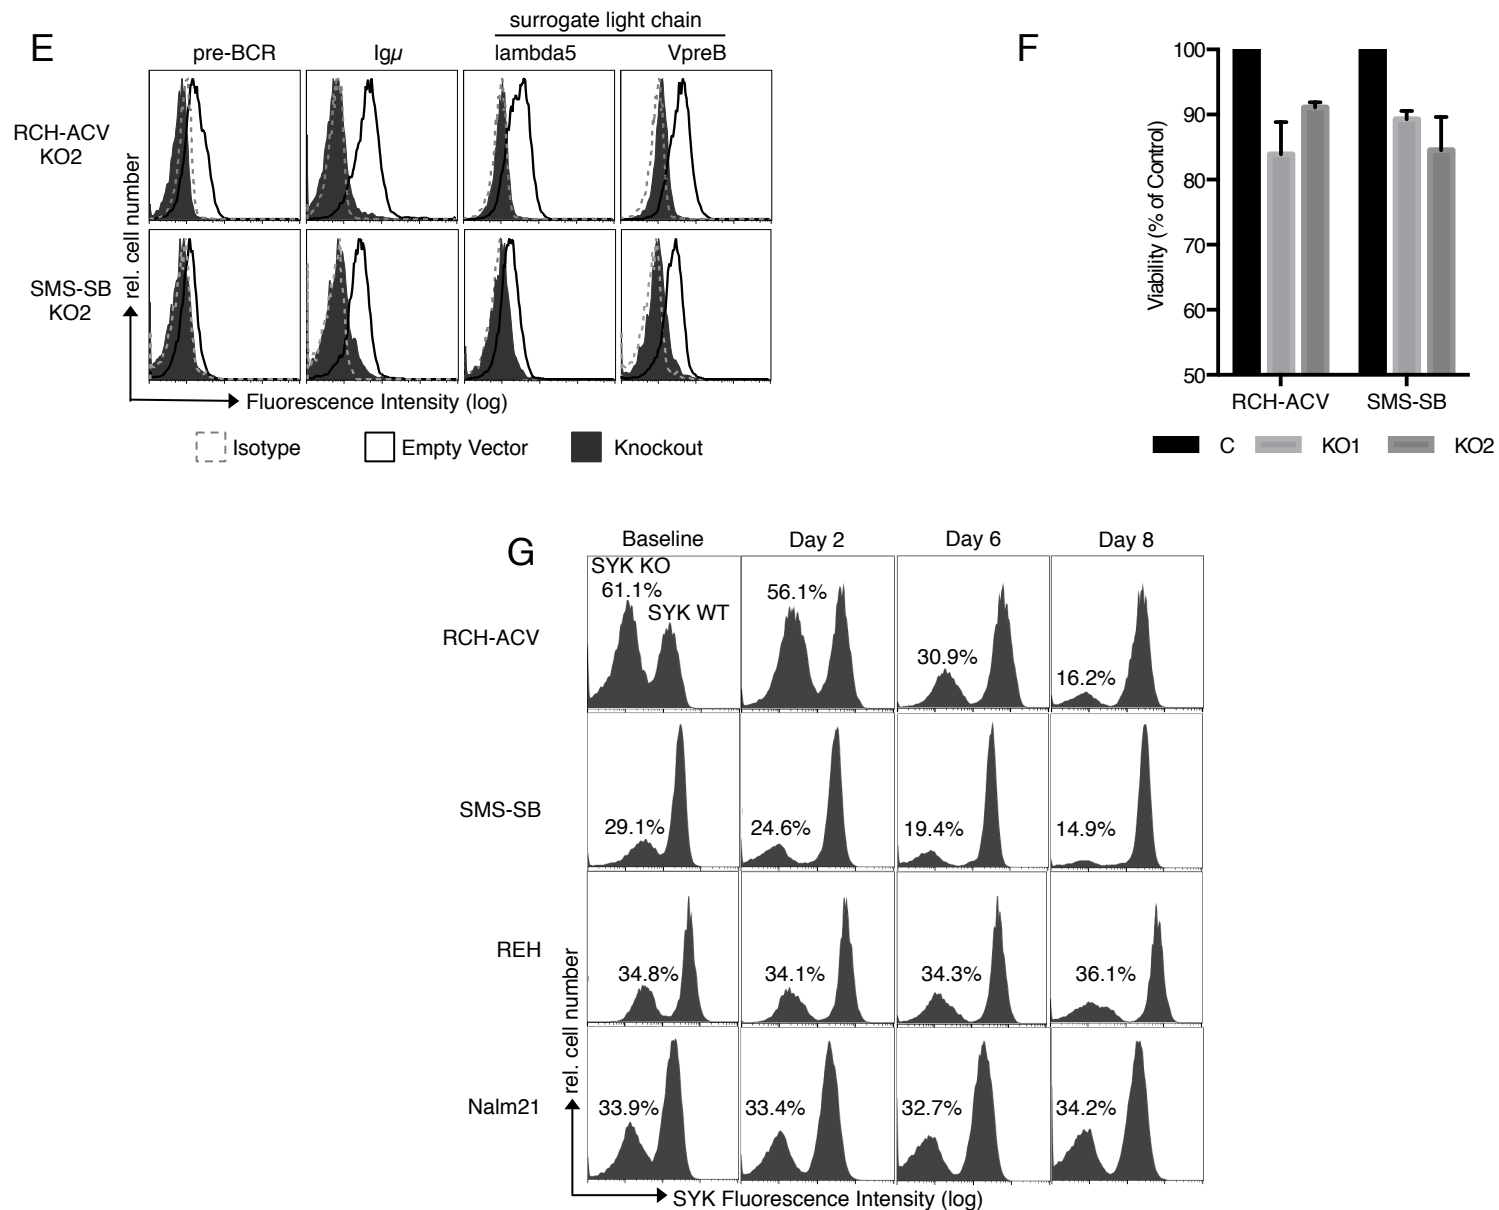

**Supplemental Figure 1.** (E) Successful abrogation of pre-BCR expression in RCH-ACV and SMS-SB cells through alternative gRNAs (KO2). (F) Viability of  $Ig\mu$ -KO cells in comparison to control (G) Transfection of B-ALL cells with SYK-specific CRISPR/Cas9 vectors results in stable knockout of SYK in a fraction of cells (SYK-KO). In SYK-dependent cells (RCH-ACV, SMS-SB) SYK KO cells disappear over time, in SYK-independent cells (REH, Nalm21) their numbers remain stable.

# Supplemental Figure 2

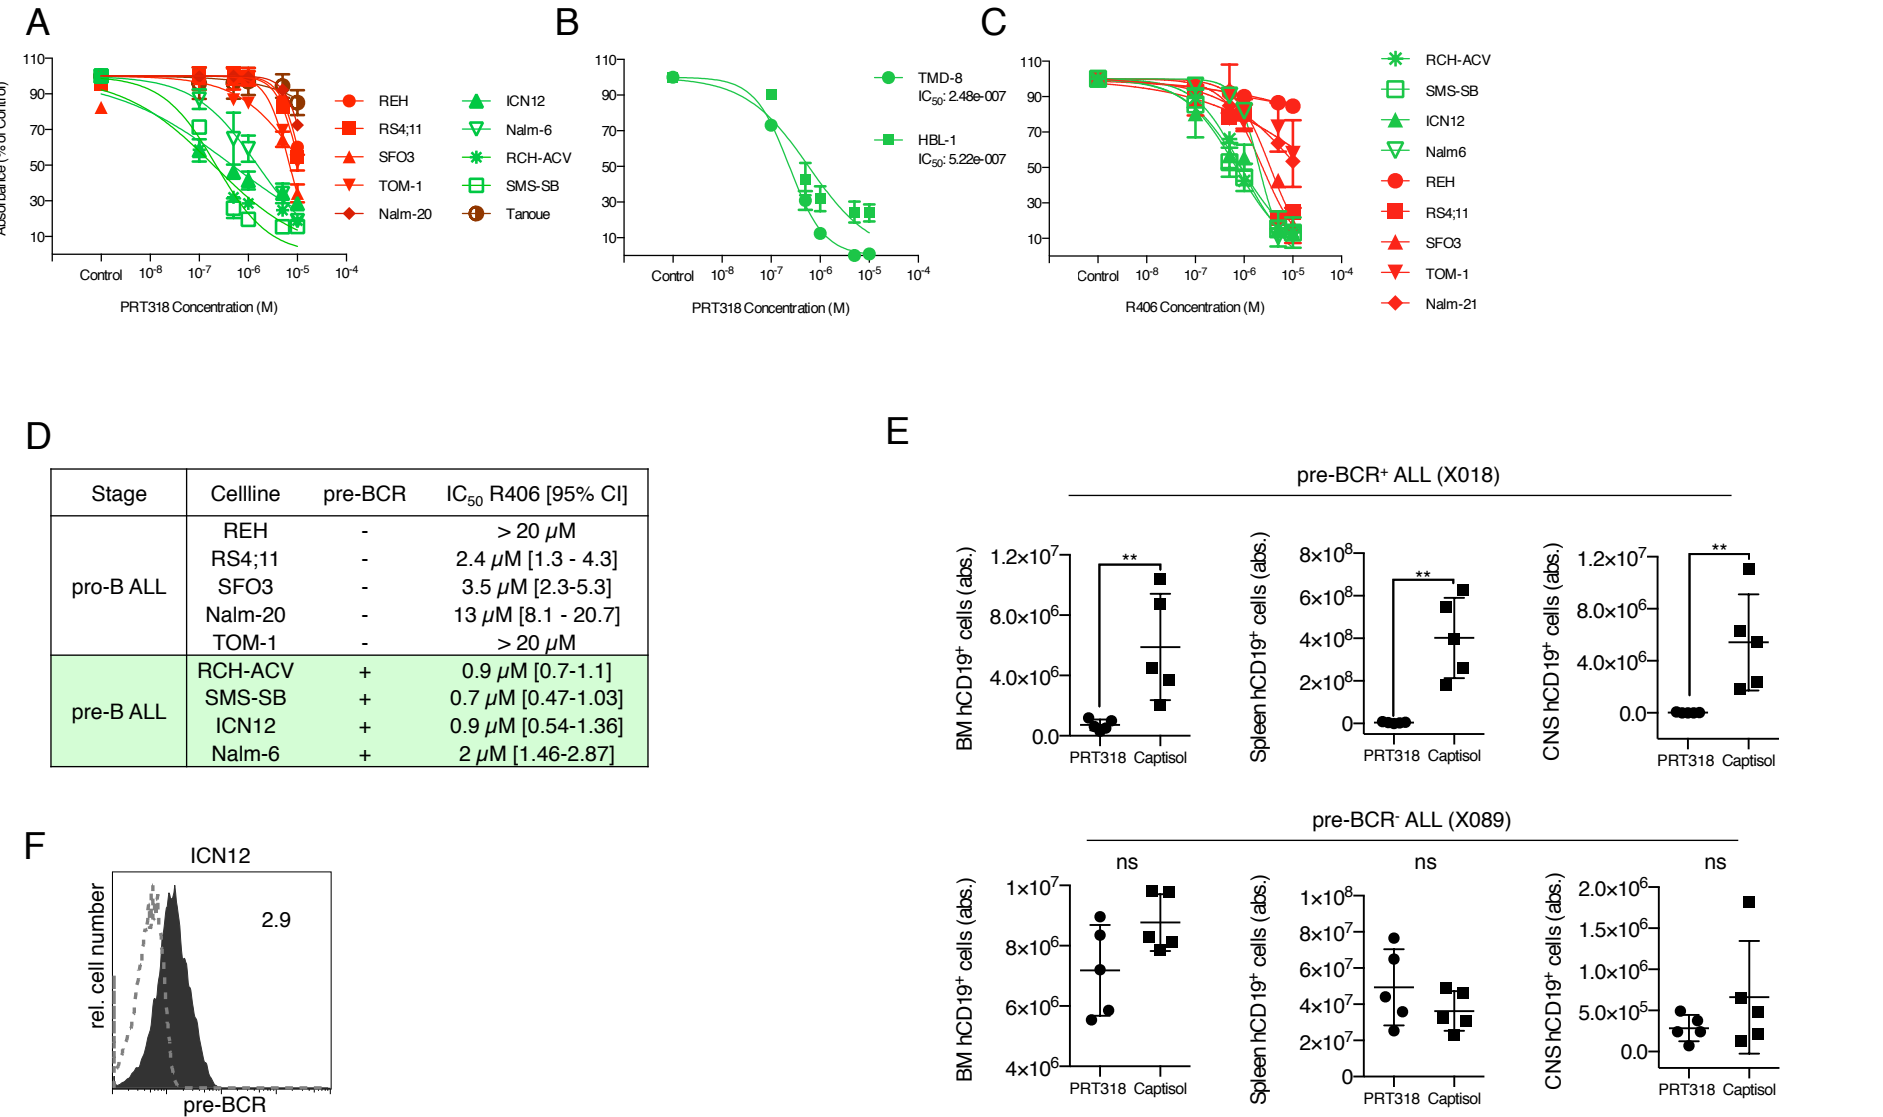

**Supplemental Figure 2.** (A) Dose response curves of PRT318 in pre-BCR<sup>+</sup> (green) and pre-BCR<sup>-</sup> (red) ALL cells and in (B) SYK-dependent DLBCL cells. (C) Dose response curves and (D) IC<sub>50</sub> values of R406 in pre-BCR<sup>+</sup> and pre-BCR<sup>-</sup> B-ALL cells. (E) Extent of leukemia cell infiltration in the bone marrow (BM), spleen and central nervous system (CNS) after 10 days of PRT318 or 5% Captisol (control). \*\*p<0.01 Mann-Whitney test. (F) Pre-BCR expression in the t(1;19)<sup>+</sup> xenograft cell line ICN12.

Supplemental Figure 2

G

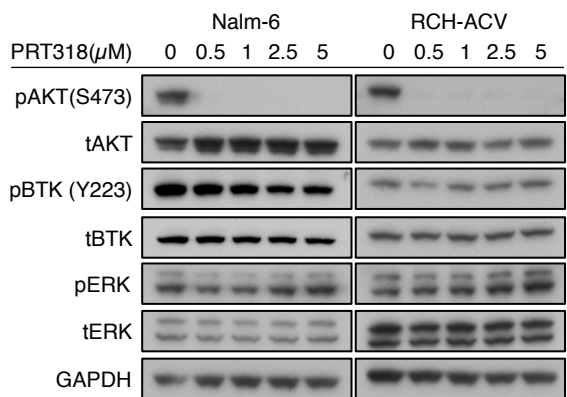

H

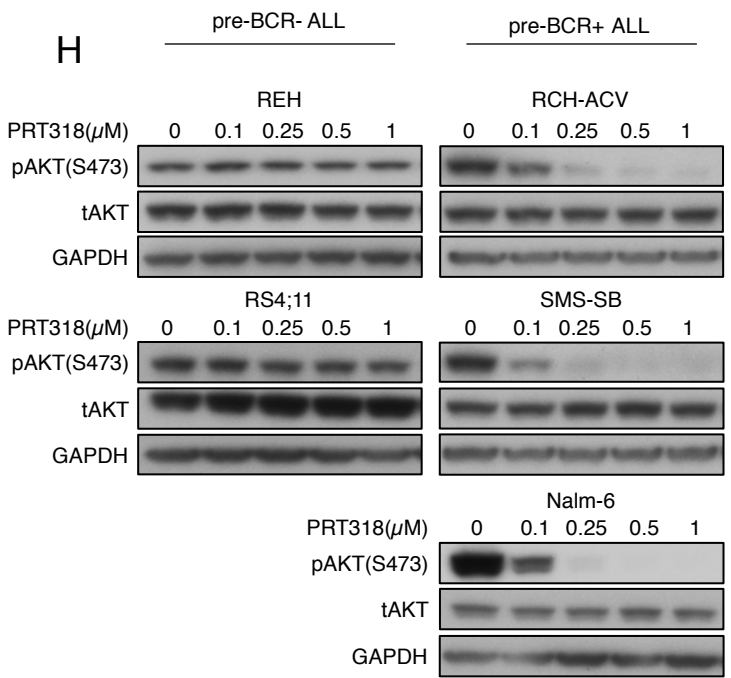

I

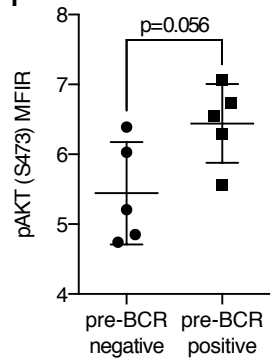

**Supplemental Figure 2.** (G) Effects of PRT318 on AKT phosphorylation in Nalm-6 and RCH-ACV cells (pre-BCR<sup>+</sup>). (H) Representative immunoblots depicting the effect of PRT318 on pAKT in pre-BCR<sup>+</sup> and pre-BCR<sup>-</sup> cells. 0.5 μM PRT318 completely blocks AKT phosphorylation in pre-BCR-dependent cells. (I) pAKT levels in pre-BCR<sup>+</sup> and pre-BCR<sup>-</sup> xenograft cells.

# Supplemental Figure 3

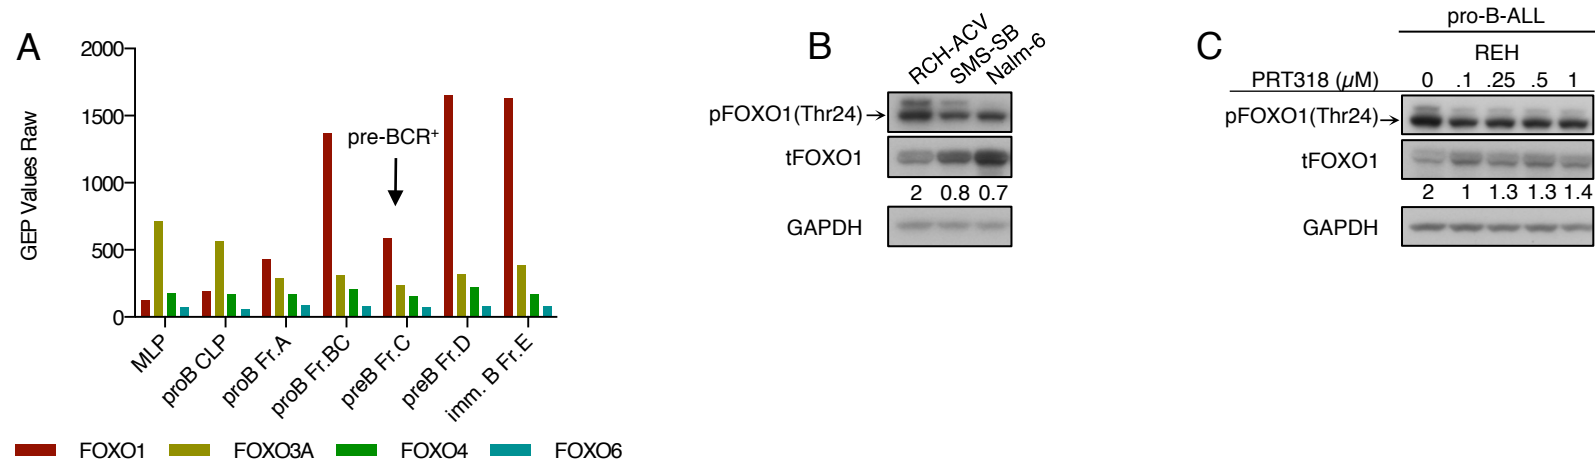

**Supplemental Figure 3.** (A) FOXO1 gene expression predominates in hematopoietic progenitors committed to the B-cell lineage (Fr. A to Fr. E). Data was kindly provided by the Immunological Genome Project. Y-axis represents raw gene expression values. Displayed are mean values from three independent experiments. (B) Expression and phosphorylation of FOXO1 in pre-BCR<sup>+</sup> ALL. Numbers indicate phospho-densitometry analysis of pFOXO1/tFOXO1. (C) Effects of PRT318 on pFOXO1 in REH cells. Numbers indicate phospho-densitometry analysis of pFOXO1/tFOXO1.

Supplemental Figure 4

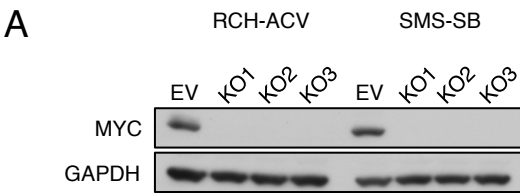

**B**

| Gene Set Name                            | FDR (q-Value) | NOM p-Value |
|------------------------------------------|---------------|-------------|
| ODONNELL_TARGETS_OF_MYC_AND_TFRC_UP      | 0.007         | <0.001      |
| SCHLOSSER_MYC_AND_SERUM_RESPONSE_SYNERGY | 0.087         | <0.001      |
| PID_MYC_ACTIVPATHWAY                     | 0.147         | 0.002       |
| SCHUHMACHER_MYC_TARGETS_UP               | 0.182         | 0.006       |

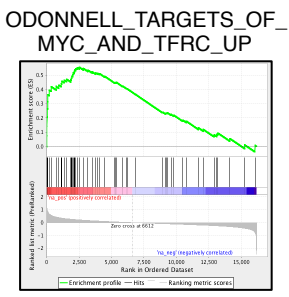

**Supplemental Figure 4.** (a) Successful knockout of MYC with three distinct gRNAs (b) Gene sets associated with MYC downmodulation, which were found to be significantly enriched in RCH-ACV cells expressing FOXO1-AAA.

# Supplementary Figure 5

SMS-SB

px458 C

px458 KO1

px458 KO2

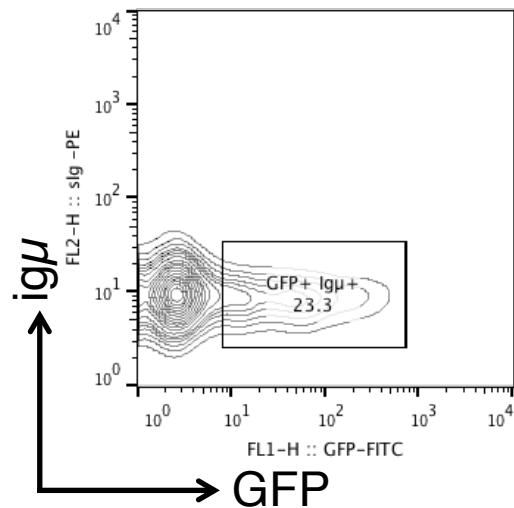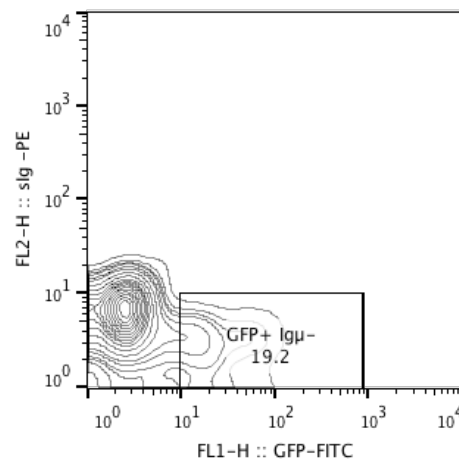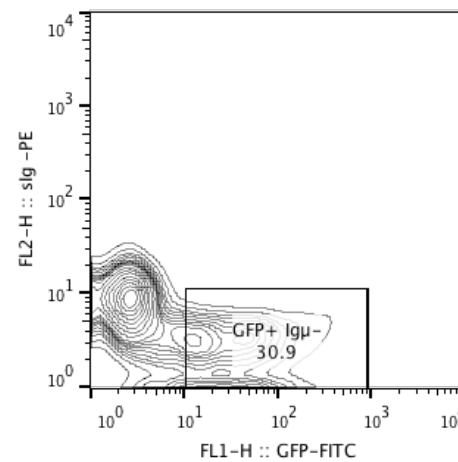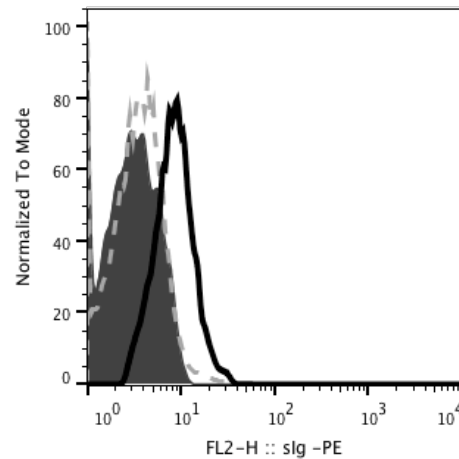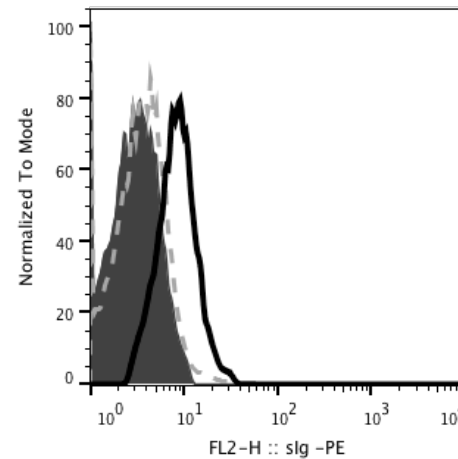

| Subset Name |
|-------------|
| GFP+ Igμ+   |
| Isotype     |
| GFP+ Igμ-   |

| Subset Name |
|-------------|
| GFP+ Igμ+   |
| Isotype     |
| GFP+ Igμ-   |

**Supplementary Figure 5.** 48h after transfection of SMS-SB cells with control vector (px458 C) or *Igμ*-specific CRISPR/Cas9 knockout vector (px458 KO1 and px458 KO2). The cells were stained for surface *Igμ* expression. GFP<sup>+</sup> cells express px458. GFP<sup>+</sup> Cells transfected with px458 control are *Igμ*<sup>+</sup>; GFP<sup>+</sup> cells transfected with px458 KO1 or KO2 lose *Igμ* expression. Histograms depict the gates from the blots in the top row. The black line represents the GFP<sup>+</sup>/*Igμ*<sup>+</sup> gate in px458 EV; Dark filled histograms represent GFP<sup>+</sup>/*Igμ*<sup>-</sup> gates in the px458 gRNA1/2 blots. Grey dotted line represents Isotype control staining.
